# Supplementary material
Source: PubMed Central journal article supplement (PMC6440765)
Supplement: JCM.01727-18-s0001.pdf [file JCM.01727-18-s0001.pdf]

1 **Supplementary file**

2 **Table S1: Univariate median regression showing factors affecting hospital LOS (hrs).**

| Variables                                                    | Intervention<br>(n=2,162) |         | Control<br>(n=2,039)   |         |
|--------------------------------------------------------------|---------------------------|---------|------------------------|---------|
|                                                              | Coefficient (95% CI)      | P-value | Coefficient (95% CI)   | P-value |
| Female vs male                                               | -1.6 (-10.4 to 7.2)       | 0.72    | 1.3 (-7.2 to 9.9)      | 0.76    |
| Age (years)                                                  | 1.2 (0.9 to 1.5)          | <0.01   | 1.3 (1.1 to 1.5)       | <0.01   |
| <b>Hospital</b>                                              |                           |         |                        |         |
| A                                                            | Ref                       |         | Ref                    |         |
| B                                                            | -3.9 (-14.7 to 7.0)       | 0.49    | -10.6 (-21.1 to -0.2)  | 0.05    |
| C                                                            | 24.7 (13.6 to 35.8)       | <0.01   | 24.8 (14.2 to 35.5)    | <0.01   |
| <b>Time of day of admission</b>                              |                           |         |                        |         |
| 7 a.m.-7 p.m. vs 7 p.m.-7 a.m.                               | -0.4 (-9.2 to 8.4)        | 0.93    | -4.1 (-12.4 to 4.5)    | 0.35    |
| <b>Day of week of admission</b>                              |                           |         |                        |         |
| Weekdays vs Weekends                                         | 4.9 (-4.8 to 14.7)        | 0.32    | 7.6 (-1.6 to 16.9)     | 0.10    |
| <b>Source of referral</b>                                    |                           |         |                        |         |
| ED vs Other <sup>1</sup>                                     | -60.3 (-92.9 to -27.7)    | <0.01   | -23.1 (-39.2 to -7.0)  | <0.01   |
| <b>Intensive care admission</b>                              |                           |         |                        |         |
| Yes vs No                                                    | 132.9 (117.3 to 148.5)    | <0.01   | 115.1 (93.3 to 136.8)  | <0.01   |
| <b>Discharged before receiving a test result<sup>2</sup></b> |                           |         |                        |         |
| Yes vs No                                                    | -70.6 (-84.4 to -56.8)    | <0.01   | NA                     |         |
| <b>Mode of separation</b>                                    |                           |         |                        |         |
| Discharged by hospital                                       | Ref                       |         | Ref                    |         |
| Transferred/discharged at own risk                           | 43.9 (30.2 to 57.7)       | <0.01   | 36.2 (21.3 to 51.1)    | <0.01   |
| Died in hospital                                             | 133.6 (112.0 to 154.7)    | <0.01   | 3.3 (-19.8 to 26.3)    | 0.78    |
| Charlson comorbidity index                                   | 15.5 (12.9 to 18.0)       | <0.01   | 17.4 (15.4 to 19.4)    | <0.01   |
| <b>Principal diagnosis</b>                                   |                           |         |                        |         |
| Influenza and pneumonia                                      | Ref                       |         | Ref                    |         |
| Chronic lower respiratory diseases                           | -2.1 (-13.6 to 9.5)       | 0.73    | -14.1 (-23.7 to -4.4)  | <0.01   |
| Acute upper respiratory infections                           | -60.4 (-83.2 to -37.7)    | <0.01   | -74.4 (-89.0 to -59.9) | <0.01   |
| Other acute lower respiratory infections <sup>3</sup>        | -32.1 (-52.7 to -11.5)    | <0.01   | -53.3 (-69.7 to -36.8) | <0.01   |
| Lung diseases due to external agents <sup>4</sup>            | 59.1 (94.5 to 141.3)      | <0.01   | 6.9 (-7.1 to 20.9)     | 0.33    |
| Other respiratory diseases <sup>5</sup>                      | 117.9 (94.5 to 141.3)     | <0.01   | -19.7 (-31.2 to -8.1)  | <0.01   |

3 ED, Emergency Department; <sup>1</sup>Medical practitioner other than private practice, outpatient, day procedure centre, community  
4 health; <sup>2</sup>Rapid PCR or multiplex PCR, <sup>3</sup>ICD-10-AM: J20-J22; <sup>4</sup>ICD-10-AM: J60-J70; <sup>5</sup>ICD-10-AM: J30-J39; J85-J84; J85-  
5 J86; J90-J94 and J95-J99. NA, Not applicable.
